# Supplementary material for: Common schizophrenia risk variants are enriched in open chromatin regions of human glutamatergic neurons
Source: PubMed Central journal article supplement (PMC7643171; doi:10.1038/s41467-020-19319-2), 2020-11-04
Supplement: 41467_2020_19319_MOESM3_ESM.pdf [file 41467_2020_19319_MOESM3_ESM.pdf]

## **Description of Additional Supplementary Files**

**Supplementary Data 1** Sample and subject level information

**Supplementary Data 2** Cell-specific open chromatin regions

**Supplementary Data 3** Region specific open chromatin regions in glutamatergic neurons

**Supplementary Data 4** Protein coding genes, lncRNA, and microRNA with TSSs overlapping cell-specific open chromatin regions

**Supplementary Data 5** Cell-specific peaks used for deconvolution of bulk ATAC-seq samples
